# Supplementary material for: Chemical constituents and antimicrobial activity of wood vinegars at different pyrolysis temperature ranges obtained from Eucommia ulmoides Olivers branches
Source: PubMed Central journal article supplement — RSC Adv. 2018 Dec 6;8(71):40941–9. doi: 10.1039/c8ra07491g (PMC9091630; doi:10.1039/c8ra07491g), 2018-12-06
Supplement: RA-008-C8RA07491G-s001.pdf [file RA-008-C8RA07491G-s001.pdf]

1

## Supplementary Data

2

### **Chemical Constituent and Antibacterial Activities of Wood Vinegars in Different Pyrolysis Temperature Ranges Obtained from *Eucommia ulmoides* Olivers Branches**

3

4

5

6

Xiaomei Hou <sup>a,b</sup>, Ling Qiu <sup>a,b,\*</sup>, Shihai Luo <sup>a,b</sup>, Kang Kang <sup>a</sup>, Mingqiang Zhu <sup>a</sup>, Yiqing  
Yao <sup>c,\*\*</sup>

7

8

9

<sup>a</sup> *College of Mechanical and Electronic Engineering, Northwest A&F University,*

10

*Yangling712100, China.*

11

<sup>b</sup> *Northwest Research Center of Rural Renewable Energy, Exploitation and Utilization of*

12

*Ministry of Agriculture, Northwest A&F University, Yangling712100, China.*

13

<sup>c</sup> *Department of Biological Systems Engineering, Washington State University, Pullman,*

14

*WA 99164-6120, USA.*

15

16

\*Corresponding authors at the College of Mechanical and Electronic Engineering,

17

Northwest A&F University, Yangling, Shaanxi 712100, China

18

Tel.: +8613992873650. E-mail address: [xbgzzh@163.com](mailto:xbgzzh@163.com).

19

\*\*Corresponding author at the Department of Biological Systems Engineering, Washington

20

State University, Pullman, WA 99164-6120, USA.

21

Tel.: þ86 13992873650; 509-339-4927. E-mail address: [dzhtyao@126.com](mailto:dzhtyao@126.com).

## 22 List of tables

23 Table S1. Results of GC–MS analysis of WV<sub>90~120</sub>~ WV<sub>270~300</sub>.

| No | Compounds               | Relative percentage (%) |                       |                       |                       |                       |                       |                       |
|----|-------------------------|-------------------------|-----------------------|-----------------------|-----------------------|-----------------------|-----------------------|-----------------------|
|    |                         | WV <sub>90~120</sub>    | WV <sub>120~150</sub> | WV <sub>150~180</sub> | WV <sub>180~210</sub> | WV <sub>210~240</sub> | WV <sub>240~270</sub> | WV <sub>270~300</sub> |
|    | <b><i>Phenols</i></b>   | <b><i>47.25</i></b>     | <b><i>44.41</i></b>   | <b><i>48.69</i></b>   | <b><i>45.44</i></b>   | <b><i>15.45</i></b>   | <b><i>42.37</i></b>   | <b><i>34.45</i></b>   |
| 1  | Phenol                  | 2.98                    | 3.95                  | 4.48                  | 3.57                  | 1.06                  | 0.67                  | 0.45                  |
| 2  | 2-Methyl-phenol         | 3.01                    | 1.40                  | 1.91                  | 1.71                  | -                     | 0.52                  | -                     |
| 3  | 3-Methyl-phenol         | -                       | 3.50                  | 4.13                  | 3.52                  | 0.62                  | -                     | -                     |
| 4  | 4-Methyl-phenol         | -                       | -                     | -                     | -                     | -                     | 1.03                  | -                     |
| 5  | Hydroquinone            | 0.86                    | 0.48                  | -                     | -                     | -                     | -                     | -                     |
| 6  | 1,2-Benzenediol         | 6.52                    | 2.67                  | 2.38                  | -                     | -                     | 0.66                  | 0.67                  |
| 7  | 2,6-Dimethyl-phenol     | -                       | -                     | -                     | -                     | 0.35                  | 0.34                  | -                     |
| 8  | 2,3-Dimethyl-phenol     | -                       | -                     | -                     | -                     | 6.05                  | -                     | -                     |
| 9  | 2,4-Dimethyl-phenol     | 0.30                    | 0.60                  | 0.61                  | 0.83                  | -                     | 0.37                  | -                     |
| 10 | 3,4-Dimethyl-phenol     | 0.32                    | 0.49                  | 0.83                  | 0.86                  | 0.83                  | -                     | -                     |
| 11 | 2-Methoxy-phenol        | 8.21                    | 10.71                 | 11.90                 | 11.84                 | 0.57                  | 4.35                  | 3.63                  |
| 12 | 3-Methoxy-phenol        | 0.55                    | 0.63                  | 0.65                  | -                     | -                     | -                     | -                     |
| 13 | Maltol                  | 0.67                    | 0.40                  | 0.36                  | 0.43                  | -                     | 0.94                  | 0.85                  |
| 14 | 4-Ethyl-3-methyl-phenol | -                       | -                     | 0.44                  | -                     | -                     | -                     | -                     |

|    |                                     |             |             |             |             |             |             |             |
|----|-------------------------------------|-------------|-------------|-------------|-------------|-------------|-------------|-------------|
| 15 | 2-Methoxy-5-methyl-phenol           | 10.90       | 6.62        | 7.44        | 8.12        | 1.86        | 3.79        | 2.87        |
| 16 | 3-Methoxy-1,2-benzenediol           | 3.68        | 3.00        | 2.48        | 1.04        | -           | 0.71        | 1.00        |
| 17 | 3,4-Dimethoxy-phenol                | 1.34        | -           | -           | 1.13        | -           | 0.51        | -           |
| 18 | 4-Ethyl-2-methoxy-phenol            | 2.13        | 2.20        | 3.27        | 3.64        | 3.10        | 3.77        | 3.24        |
| 19 | 2,6-Dimethoxy-phenol                | 4.08        | 6.27        | 6.86        | 6.62        | 0.35        | 7.75        | 8.14        |
| 20 | (E)-2-Methoxy-4-(1-propenyl)-phenol | -           | -           | -           | -           | -           | 2.90        | 0.95        |
| 21 | Eugenol                             | -           | -           | -           | -           | -           | -           | 0.73        |
| 22 | 3-Allyl-6-methoxy-phenol            | -           | -           | -           | -           | -           | 1.06        | -           |
| 23 | 2-Ethyl-4-methyl-phenol             | -           | -           | -           | -           | 0.66        | -           | -           |
| 24 | 2-Methoxy-4-propyl-phenol           | 0.97        | 0.43        | -           | -           | -           | 1.06        | 1.09        |
| 25 | 5-Tert-butylpyrogallol              | 0.73        | 0.76        | 0.95        | 1.34        | -           | -           | -           |
| 26 | 2,6-Dimethoxy-4-(2-propenyl)-phenol | -           | -           | -           | -           | -           | 7.86        | 7.16        |
| 27 | Desaspidinol                        | -           | 0.30        | -           | 0.79        | -           | 4.08        | 3.67        |
|    | <b>Organic acids</b>                | <b>3.16</b> | <b>4.86</b> | <b>2.98</b> | <b>2.92</b> | <b>5.81</b> | <b>6.33</b> | <b>1.05</b> |
| 28 | Butanoic acid                       | 1.77        | 1.34        | 0.72        | -           | -           | -           | -           |
| 29 | Pentanoic acid                      | -           | 0.66        | 0.58        | 0.56        | 0.64        | -           | -           |
| 30 | 4-Hydroxy-2-pentenoic acid          | -           | -           | -           | 0.70        | -           | -           | -           |
| 31 | Hexanoic acid                       | 0.59        | -           | -           | -           | 0.60        | -           | -           |
| 32 | 5-amino-Pyrazole-4-carboxylic acid  | -           | -           | -           | -           | -           | 0.34        | -           |
| 33 | 4-Methyl-pentanoic acid             | -           | -           | -           | -           | 1.63        | -           | -           |

|    |                                       |              |              |              |              |              |              |              |
|----|---------------------------------------|--------------|--------------|--------------|--------------|--------------|--------------|--------------|
| 34 | 2-Methyl-propanoic-acid, anhydride    | -            | -            | -            | 0.55         | 1.99         | 1.35         | -            |
| 35 | Butanoic acid, anhydride              | -            | 1.76         | 1.68         | 1.11         | 0.95         | 0.59         | 0.67         |
| 36 | 3-Hydroxy-4-methoxy-benzoic acid      | -            | -            | -            | -            | -            | 4.05         | -            |
| 37 | 4-Hydroxy-3-methyl-benzeneacetic acid | 0.80         | 0.53         | -            | -            | -            | -            | -            |
| 38 | 2-Methyl-cyclopentanecarboxylic acid, | -            | -            | -            | -            | -            | -            | 0.38         |
| 39 | [1,2,3]Thiadiazole-4-carboxylic acid  | -            | 0.57         | -            | -            | -            | -            | -            |
|    | <b><i>Ketones</i></b>                 | <b>27.12</b> | <b>23.22</b> | <b>19.73</b> | <b>19.94</b> | <b>11.41</b> | <b>18.48</b> | <b>19.83</b> |
| 40 | Cyclopentanone                        | 1.38         | 1.75         | 1.76         | 1.71         | -            | 0.48         | 0.37         |
| 41 | 2(5H)-Furanone                        | 0.72         | 0.63         | 0.35         | 0.51         | -            | -            | 1.07         |
| 42 | 2-Methyl-2-cyclopenten-1-one          | 1.19         | 1.58         | 1.55         | 1.43         | 4.01         | 3.20         | -            |
| 43 | 5-Methyl-2-furancarboxaldehyde        | -            | -            | -            | -            | -            | -            | 2.03         |
| 44 | 2-Cyclohexen-1-one                    | -            | -            | -            | -            | 0.44         | -            | -            |
| 45 | 2-Methyl-cyclopentanone               | 0.45         | 0.62         | -            | -            | -            | -            | -            |
| 46 | 4-Methyl-5H-furan-2-one               | 0.32         | -            | -            | -            | -            | -            | -            |
| 47 | 5-Methyl-2(3H)-furanone               | 1.23         | 1.02         | -            | -            | -            | -            | -            |
| 48 | 5-Methyl-2(5H)-furanone               | 0.35         | -            | -            | -            | 0.62         | -            | -            |
| 49 | (R)-(+)-3-Methyl-cyclopentanone       | -            | -            | -            | 0.39         | -            | -            | -            |
| 50 | 3-Methylene-2-pentanone               | -            | -            | -            | -            | -            | -            | 0.30         |
| 51 | Cyclohexanone                         | -            | -            | -            | 0.46         | -            | -            | -            |
| 52 | 1-(2-Furanyl)-ethanone                | 1.77         | 1.91         | 2.03         | 2.05         | 1.01         | 1.82         | 0.80         |

|    |                                                         |      |      |      |      |      |      |      |
|----|---------------------------------------------------------|------|------|------|------|------|------|------|
| 53 | 3,4-Dimethyl-2-cyclopenten-1-one                        | 0.84 | 0.81 | 1.50 | 1.10 | -    | -    | -    |
| 54 | 2,3-Dimethyl-2-cyclopenten-1-one                        | 0.99 | 1.56 | 1.72 | 1.57 | 1.27 | 0.56 | 0.46 |
| 55 | 2,5-Dihydro-3,5-dimethyl-2-furanone                     | 0.95 | 1.05 | 0.98 | 0.75 | 1.42 | 0.41 | 0.49 |
| 56 | 2-Hydroxy-3-methyl-2-cyclopenten-1-one                  | 5.54 | 5.31 | 4.30 | 2.92 | -    | 2.06 | 2.55 |
| 57 | 1-Methyl-2-piperidinone                                 | -    | -    | -    | -    | -    | -    | 0.88 |
| 58 | 4-Acetyl-5-methyl-1,3-dihydro-2H-imidazol-2-one         | 0.43 | -    | -    | -    | -    | -    | -    |
| 59 | 1-(Acetyloxy)-2-propanone                               | 1.16 | 0.95 | 0.86 | 1.76 | -    | -    | -    |
| 60 | 2,3,4-Trimethyl-2-cyclopenten-1-one                     | -    | -    | -    | -    | 1.07 | -    | -    |
| 61 | 3-Ethyl-2-hydroxy-2-cyclopenten-1-one                   | 3.15 | 2.85 | 2.37 | 1.59 | 0.30 | 0.91 | 1.45 |
| 62 | 2,5-Dimethyl-4-hydroxy-3(2H)-furanone                   | -    | -    | -    | -    | -    | 0.32 | -    |
| 63 | 1,2-Cyclopentanedione                                   | -    | -    | 0.54 | -    | 0.70 | 1.22 | 2.20 |
| 64 | 2-Hydroxy-3-propyl-2-cyclopenten-1-one                  | -    | -    | 0.36 | 0.32 | 0.57 | -    | -    |
| 65 | 3,4-Dimethyl-2,5-hexanedione                            | -    | 0.51 | -    | -    | -    | -    | -    |
| 66 | 4-Hydroxy-2-methyl-acetophenone                         | -    | -    | -    | -    | -    | -    | 0.33 |
| 67 | 7-Methyloctane-2,4-dione                                | 0.60 | -    | -    | -    | -    | -    | -    |
| 68 | 2,5-Dihydroxypropiophenone                              | -    | -    | -    | -    | -    | 0.54 | -    |
| 69 | 1-(4-Hydroxy-3-methoxyphenyl)-ethanone                  | 0.55 | 0.44 | 0.35 | 0.40 | -    | 0.69 | 0.64 |
| 70 | 2-Hydroxy-3-methyl-6-(1-methylethyl)-2-cyclohexen-1-one | 0.66 | 0.43 | -    | -    | -    | -    | -    |
| 71 | 1-(4-Hydroxy-3-methoxyphenyl)-2-propanone               | 1.41 | 1.20 | 1.03 | 1.67 | -    | 0.39 | -    |
| 72 | 3',5'-Dimethoxyacetophenone                             | -    | -    | -    | -    | -    | 0.35 | 0.68 |

|    |                                                         |             |             |              |              |             |             |             |
|----|---------------------------------------------------------|-------------|-------------|--------------|--------------|-------------|-------------|-------------|
| 73 | 2',4'-Dihydroxy-3'-methylpropiophenone                  | -           | -           | -            | -            | -           | 0.48        | 0.31        |
| 74 | 4H-1,3-benzodioxin-4-one                                | -           | -           | -            | -            | -           | -           | 0.58        |
| 75 | 5-Dimethyl-4H-1,3-benzodioxin-4-one                     | -           | -           | -            | 0.81         | -           | -           | -           |
| 76 | Hexahydro-4a,5-dimethyl-4H-1,3-benzodioxin-4-one        | 1.63        | -           | -            | -            | -           | --          | -           |
| 77 | 6,6-Dimethyl-2-(2-oxopropyl)-bicyclo[3.1.1]heptan-3-one | -           | -           | -            | -            | -           | 0.42        | -           |
| 78 | 1-(4-Hydroxy-3,5-dimethoxyphenyl)-ethanone              | -           | -           | -            | 0.50         | -           | 2.15        | 2.11        |
| 79 | 1-(4-Isopropoxy-3-methoxyphenyl)-propan-2-one           | -           | -           | -            | -            | -           | 2.48        | 2.05        |
| 80 | 9-Ethoxy-10-oxatricyclo[7.2.1.0(1,6)]dodecan-11-one     | -           | -           | -            | -            | -           | -           | 0.53        |
|    | <b><i>Aldehydes</i></b>                                 | <b>7.32</b> | <b>4.24</b> | <b>11.34</b> | <b>15.98</b> | <b>7.17</b> | <b>9.32</b> | <b>6.79</b> |
| 81 | Furfural                                                | 4.13        | -           | -            | -            | -           | 4.58        | 4.49        |
| 82 | 3-Furaldehyde                                           | -           | -           | 7.48         | 9.58         | 0.48        | -           | -           |
| 83 | 2-Methyl-cyclopentanone                                 | -           | 0.62        | -            | -            | -           | -           | -           |
| 84 | 5-Methyl-2-furancarboxaldehyde,                         | 2.60        | 3.10        | 3.32         | 4.31         | -           | -           | -           |
| 85 | 3-Hydroxy-benzaldehyde                                  | -           | -           | -            | -            | 0.98        | -           | -           |
| 86 | 5-(Hydroxymethyl)-2-furancarboxaldehyde                 | -           | -           | -            | -            | 2.71        | 0.68        | 0.51        |
| 87 | Vanillin                                                | 0.59        | 0.52        | 0.54         | 0.83         | -           | 0.51        | -           |
| 88 | 5-Acetoxy-methyl-2-furaldehyde                          | -           | -           | -            | 0.35         | 3.00        | 0.56        | 0.43        |
| 89 | 3-(4-Hydroxy-3-methoxyphenyl)-2-propenal                | -           | -           | -            | -            | -           | 0.72        | -           |
| 90 | 4-Hydroxy-3,5-dimethoxy-benzaldehyde                    | -           | -           | -            | 0.91         | -           | 1.46        | 1.01        |

|     |                                               |             |             |             |             |              |             |             |
|-----|-----------------------------------------------|-------------|-------------|-------------|-------------|--------------|-------------|-------------|
| 91  | 3,5-Dimethoxy-4-hydroxycinnamaldehyde         | -           | -           | -           | -           | -            | 0.81        | 0.35        |
|     | <i>Alcohols</i>                               | <b>7.57</b> | <b>5.44</b> | <b>3.70</b> | <b>3.74</b> | <b>0.53</b>  | <b>4.73</b> | <b>6.89</b> |
| 92  | 3-Furanmethanol                               | 2.91        | 3.14        | 0.37        | 3.39        | -            | 3.43        | 4.29        |
| 93  | 2-Furanmethanol                               | 2.69        | -           | 2.78        | -           | -            | 0.59        | -           |
| 94  | Cyclopropanemethanol                          | -           | 2.30        | -           | -           | -            | -           | -           |
| 95  | 2,3-Dimethyl-cyclohexanol                     | -           | -           | -           | -           | 0.53         | -           | -           |
| 96  | 1,2,2,3-Tetramethylcyclopent-3-enol           | -           | -           | -           | 0.35        | -            | -           | -           |
| 97  | 4-Propyl-1,6-heptadien-4-ol                   | -           | -           | -           | -           | -            | -           | 1.77        |
| 98  | 2,4-Dimethoxybenzyl alcohol                   | -           | -           | -           | -           | -            | -           | 0.32        |
| 99  | 1-Butyl-3-methyl-2-cyclohexen-1-ol            | -           | -           | -           | -           | -            | 0.33        | -           |
| 100 | 6-Methyl-5-(1-methylethyl)-3-heptyne-2,5-diol | 0.50        | -           | -           | -           | -            | -           | -           |
| 101 | 2,5-Dimethyl-cyclohexanethiol                 | -           | -           | -           | -           | -            | -           | 0.51        |
| 102 | 2-Ethyl-cyclohexanethiol, acetate             | -           | -           | -           | -           | -            | 0.38        | -           |
| 103 | 2,5-Dimethyl-2-nitro-1,3-cyclohexanediol      | -           | -           | 0.55        | -           | -            | -           | -           |
| 104 | P-octyloxybenzyl alcohol                      | 1.47        | -           | -           | -           | -            | -           | -           |
|     | <i>Esters</i>                                 | <b>0.88</b> | <b>0.89</b> | <b>2.82</b> | <b>1.18</b> | <b>10.48</b> | <b>5.64</b> | <b>6.09</b> |
| 105 | Propanoic acid, ethenyl ester                 | 0.88        | 0.89        | 0.80        | 0.65        | 0.65         | 0.53        | 0.62        |
| 106 | 2-Oxo-propanoic acid, ethyl ester             | -           | -           | -           | -           | 0.61         | -           | 0.30        |
| 107 | 2-Methyl-propanoic acid, ethyl ester          | -           | -           | -           | -           | -            | 0.32        | 0.42        |
| 108 | Methyl 2-furoate                              | -           | -           | 0.38        | 0.53        | -            | -           | 0.51        |

|     |                                                                       |   |   |      |   |      |      |      |
|-----|-----------------------------------------------------------------------|---|---|------|---|------|------|------|
| 109 | 1,2-Ethanediol, diacetate                                             | - | - | -    | - | 0.76 | 2.20 | 2.08 |
| 110 | Pentanedioic acid, dimethyl ester                                     | - | - | -    | - | 0.65 | -    | -    |
| 111 | Ethyl 3-(2-furyl)propenoate                                           | - | - | -    | - | -    | -    | 0.31 |
| 112 | Isopentyloxyethyl acetate                                             | - | - | -    | - | 6.94 | -    | -    |
| 113 | Butanoic acid, 2-ethylcyclohexyl ester                                | - | - | 1.64 | - | -    | -    | -    |
| 114 | Disulfide, bis(1,1-dimethylpropyl)                                    | - | - | -    | - | 0.51 | -    | -    |
| 115 | 2-Thiopheneacetic acid, cyclopentyl ester                             | - | - | -    | - | -    | 1.12 | -    |
| 116 | Methyl(3,4-dimethoxyphenyl)(hydroxy)acetate                           | - | - | -    | - | -    | 1.47 | 1.95 |
| 117 | Pentanoic acid, 2,2,4-trimethyl-3-carboxyisopropyl,<br>isobutyl ester | - | - | -    | - | 0.36 | -    | -    |

24

25



26 Table S2. Results of GC–MS analysis of WV<sub>300–330</sub>~WV<sub>480–510</sub>.

| No | Compounds                 | Relative percentage (%) |                       |                       |                       |                       |                       |                       |
|----|---------------------------|-------------------------|-----------------------|-----------------------|-----------------------|-----------------------|-----------------------|-----------------------|
|    |                           | WV <sub>300–330</sub>   | WV <sub>330–360</sub> | WV <sub>360–390</sub> | WV <sub>390–420</sub> | WV <sub>420–450</sub> | WV <sub>450–480</sub> | WV <sub>480–510</sub> |
|    | <b><i>Phenols</i></b>     | <b>35.50</b>            | <b>38.58</b>          | <b>45.67</b>          | <b>37.75</b>          | <b>42.13</b>          | <b>44.91</b>          | <b>48.80</b>          |
| 1  | Phenol                    | 0.34                    | 0.30                  | 0.67                  | 0.77                  | 1.27                  | 2.18                  | 2.64                  |
| 2  | 2-Methyl-phenol           | -                       | 0.62                  | 0.31                  | 0.58                  | 0.88                  | 0.97                  | 1.20                  |
| 3  | 3-Methyl-phenol           | -                       | 1.08                  | 1.26                  | -                     | 1.10                  | 2.28                  | 2.59                  |
| 4  | 4-Methyl-phenol           | 1.48                    | -                     | -                     | 0.81                  | -                     | -                     | -                     |
| 5  | 1,2-Benzenediol           | 3.87                    | 5.26                  | -                     | -                     | -                     | -                     | -                     |
| 6  | Hydroquinone              | 0.61                    | 1.28                  | 0.61                  | 0.73                  | -                     | 1.27                  | 0.58                  |
| 7  | 2,5-Dimethyl-phenol       | -                       | -                     | -                     | 1.08                  | 0.83                  | 0.80                  | -                     |
| 8  | 3,5-Dimethyl-phenol       | -                       | -                     | -                     | 0.49                  | -                     | -                     | 0.76                  |
| 9  | 2-Methyl-1,3-benzenediol  | -                       | -                     | -                     | -                     | 0.74                  | -                     | 3.45                  |
| 10 | 2-Methoxy-phenol          | 3.75                    | 4.05                  | 4.75                  | 4.01                  | 8.39                  | 7.43                  | 7.53                  |
| 11 | Maltol                    | 1.20                    | 1.22                  | 0.77                  | 0.50                  | -                     | -                     | 0.51                  |
| 12 | 2-Methoxy-3-methyl-phenol | -                       | -                     | -                     | 1.01                  | 1.21                  | -                     | -                     |
| 13 | 2-Methoxy-4-methyl-phenol | -                       | -                     | -                     | 4.32                  | 4.43                  | -                     | -                     |
| 14 | 2-Methoxy-5-methyl-phenol | 3.08                    | 3.02                  | 4.96                  | 0.77                  | 1.21                  | 4.27                  | 3.71                  |
| 15 | 4-Methoxy-3-methyl-phenol | -                       | 0.54                  | -                     | -                     | -                     | -                     | -                     |
| 16 | 3-Methoxy-1,2-benzenediol | 2.38                    | 3.75                  | 3.66                  | 1.75                  | -                     | 6.50                  | 7.08                  |

|    |                                        |             |             |             |             |             |             |             |
|----|----------------------------------------|-------------|-------------|-------------|-------------|-------------|-------------|-------------|
| 17 | 4-Ethyl-2-methoxy-phenol               | 2.69        | 2.71        | 4.50        | 5.48        | 3.76        | 5.78        | 4.88        |
| 18 | 4-(Aminomethyl)-2-methoxy-phenol       | -           | -           | -           | -           | -           | -           | 0.44        |
| 19 | 2,6-Dimethoxy-phenol                   | 7.35        | 7.31        | 9.85        | 10.12       | 12.14       | 10.55       | 10.87       |
| 20 | 3,4-Dimethoxy-phenol                   | -           | -           | -           | -           | 0.95        | -           | -           |
| 21 | 3-Allyl-6-methoxyphenol                | -           | -           | 0.49        | -           | -           | -           | -           |
| 22 | (E)-2-Methoxy-4-(1-propenyl)-phenol    | -           | -           | 2.37        | 0.99        | 0.42        | -           | -           |
| 23 | (E)-2-Methoxy-5-(1-propenyl)-phenol    | 0.52        | 0.36        | -           | -           | -           | -           | -           |
| 24 | 2-Methoxy-4-propyl-phenol              | 1.92        | 2.60        | 1.57        | -           | 1.10        | -           | -           |
| 25 | 3-(1,1-Dimethylethyl)-4-methoxy-phenol | -           | -           | -           | 0.70        | -           | -           | -           |
| 26 | 5-Tert-butylpyrogallol                 | -           | -           | 5.02        | -           | -           | 2.19        | 1.93        |
| 27 | 2,6-Dimethoxy-4-(2-propenyl)-phenol    | 4.15        | 3.03        | 3.28        | 2.35        | 1.79        | -           | -           |
| 28 | 2,4-Bis(1,1-dimethylethyl)-Phenol      | -           | -           | -           | -           | 0.52        | -           | -           |
| 29 | Desaspidinol                           | 2.16        | 1.45        | 1.60        | 1.30        | 1.39        | 0.69        | 0.63        |
|    | <b>Organic acids</b>                   | <b>0.00</b> | <b>0.34</b> | <b>1.50</b> | <b>4.39</b> | <b>1.33</b> | <b>2.03</b> | <b>4.39</b> |
| 30 | Butanoic acid                          | -           | 0.34        | 0.89        | 1.77        | -           | 1.09        | 2.38        |
| 31 | Pentanoic acid                         | -           | -           | -           | -           | 0.43        | -           | -           |
| 32 | 4-Hydroxy-butanoic acid                | -           | -           | -           | -           | -           | 0.94        | 1.13        |
| 33 | 3-Hydroxy-3-methylvaleric acid         | -           | -           | -           | -           | -           | -           | 0.88        |
| 34 | 2-Methyl-propanoic acid, anhydride     | -           | -           | -           | 1.72        | -           | -           | -           |
| 35 | 4-Hydroxy-3-methoxy-benzoic acid       | -           | -           | -           | -           | 0.44        | -           | -           |

|    |                                                 |              |              |              |              |              |              |              |
|----|-------------------------------------------------|--------------|--------------|--------------|--------------|--------------|--------------|--------------|
| 36 | 2-(N-Methyl-N-phosphonomethyl)amino-acetic acid | -            | -            | 0.61         | 0.90         | -            | -            | -            |
| 37 | Bicyclo[2.2.1]heptane-1,2-dicarboxylic acid     | -            | -            | -            | -            | 0.46         | -            | -            |
|    | <b><i>Ketones</i></b>                           | <b>21.72</b> | <b>22.03</b> | <b>16.15</b> | <b>19.10</b> | <b>24.56</b> | <b>15.72</b> | <b>16.80</b> |
| 38 | Cyclopentanone                                  | -            | 0.39         | -            | -            | 0.33         | 0.81         | -            |
| 39 | 2(5H)-Furanone                                  | 1.51         | 1.51         | 0.66         | 0.48         | -            | 0.51         | 0.65         |
| 40 | 5-Methyl-2-furancarboxaldehyde                  | -            | 1.91         | -            | -            | -            | -            | -            |
| 41 | 2-Methyl-2-cyclopenten-1-one                    | -            | 0.93         | 0.57         | 1.39         | 0.80         | 0.71         | 0.85         |
| 42 | 2-Methyl-2-cyclopenten-1-one                    | 1.17         | -            | -            | -            | 1.66         | 0.96         | 1.18         |
| 43 | 5-Methyl-2(3H)-furanone                         | 0.31         | -            | -            | -            | 1.06         | -            | -            |
| 44 | 2-Methyl-cyclopentanone                         | -            | -            | -            | -            | 0.74         | 0.54         | 0.60         |
| 45 | 4-Methyl-5H-furan-2-one                         | -            | 0.34         | -            | -            | -            | -            | -            |
| 46 | 1-(2-Furanyl)-ethanone                          | 0.94         | 0.83         | 0.93         | -            | -            | -            | -            |
| 47 | 3,3-Dimethyl-2-butanone                         | -            | -            | -            | 0.89         | -            | -            | -            |
| 48 | 2,3-Dimethyl-2-cyclopenten-1-one                | 0.61         | -            | 0.88         | -            | 1.56         | 1.06         | 1.43         |
| 49 | 2-Cyclopenten-1-one                             | -            | -            | -            | 0.93         | 0.72         | 0.75         | 1.23         |
| 50 | 2,5-Dihydro-3,5-dimethyl-2-furanone             | 0.68         | 0.60         | 0.48         | 0.35         | -            | 0.31         | 0.44         |
| 51 | 2-Hydroxy-3-methyl-2-cyclopenten-1-one          | 4.51         | 4.53         | 3.59         | -            | -            | 4.48         | 5.16         |
| 52 | 3-Methyl-1,2-cyclopentanedione                  | -            | -            | -            | 3.37         | 4.99         | -            | -            |
| 53 | 1-Methyl-2-piperidinone                         | 0.70         | -            | -            | -            | -            | -            | -            |
| 54 | 2,5-Hexanedione                                 | -            | -            | -            | -            | -            | 0.35         | 0.48         |

|    |                                                        |      |      |      |      |      |      |      |
|----|--------------------------------------------------------|------|------|------|------|------|------|------|
| 55 | 1-(Acetyloxy)- 2-propanone                             | -    | -    | 0.58 | 1.28 | 2.08 | -    | 1.61 |
| 56 | 2-Hydroxy-3-propyl-2-cyclopenten-1-one                 | -    | 0.38 | -    | 0.62 | 0.69 | -    | -    |
| 57 | 4,4-Dimethyl-2-cyclohexen-1-one                        | 0.41 | -    | -    | -    | -    | -    | -    |
| 58 | 3-Ethyl-2-hydroxy-2-cyclopenten-1-one                  | 2.40 | 1.56 | 1.35 | 2.04 | 2.47 | 2.40 | 2.38 |
| 59 | 2,3-Dihydro-1H-Inden-1-one                             | -    | 0.48 | -    | -    | -    | -    | -    |
| 60 | 1,2-Cyclopentanedione                                  | 3.76 | 2.81 | 1.38 | 0.98 | -    | -    | -    |
| 61 | 5-Hydroxy-2-(hydroxymethyl)-4H-pyran-4-one             | 0.38 | -    | -    | -    | -    | -    | -    |
| 62 | 5-(1,2-Dihydroxyethyl)dihydrofuran-2-one               | -    | -    | 0.34 | -    | -    | -    | -    |
| 63 | 1,4,5,6,7,7a-Hexahydro-7a-methyl-2H-inden-2-one        | -    | -    | -    | -    | 0.85 | -    | -    |
| 64 | 1-(2-Hydroxy-5-methylphenyl)-ethanone                  | 0.32 | 0.75 | -    | -    | -    | -    | -    |
| 65 | 4-Hydroxy-2-methylacetophenone                         | -    | -    | 0.34 | -    | -    | -    | -    |
| 66 | 4-Hydroxy-3-methylacetophenone                         | -    | -    | -    | 0.77 | -    | -    | -    |
| 67 | 4-Hydroxy-2,4,5-trimethyl-2,5-cyclohexadien-1-one      | -    | -    | -    | 1.31 | 1.04 | 0.60 | -    |
| 68 | 2-Methyl-4-(1-methylethyl)-2-cyclohexenone             | -    | -    | -    | -    | 0.57 | -    | -    |
| 69 | 7-Methoxy-3-oxabicyclo[3.3.0]oct-7-en-2-one            | -    | -    | 1.41 | -    | -    | -    | -    |
| 70 | 2-Acetyl-4-methyl-1,3-cyclopentanedione                | -    | -    | -    | -    | -    | 1.17 | -    |
| 71 | 3-Methyl-1-phenyl-2-butanone                           | -    | -    | -    | -    | 1.04 | -    | -    |
| 72 | 1-(2-Hydroxy-6-methoxyphenyl)-ethanone                 | -    | -    | -    | 0.53 | -    | -    | -    |
| 73 | 3,4,4a,5,6,7-Hexahydro-4a-methyl-2H-1-benzopyran-2-one | -    | -    | -    | 0.70 | -    | -    | -    |

|    |                                                            |             |             |             |             |             |             |             |
|----|------------------------------------------------------------|-------------|-------------|-------------|-------------|-------------|-------------|-------------|
| 74 | Spiro[4.5]Decane-1,6-dione                                 | -           | -           | -           | 0.53        | -           | -           | -           |
| 75 | 1-(4-Hydroxy-3-methoxyphenyl)-ethanone                     | 0.47        | 0.38        | 0.32        | -           | -           | -           | -           |
| 76 | 2',6'-Dihydroxy-3'-methylacetophenone                      | -           | 0.74        | -           | -           | -           | -           | -           |
| 77 | 2-Hydroxy-3-methyl-6-(1-methylethyl)-2-cyclohexen-1-one    | 0.39        | -           | -           | -           | 0.44        | -           | -           |
| 78 | 2-Hydroxy-4,4,6,6-tetramethyl-2-cyclohexen-1-one           | -           | 0.78        | -           | -           | -           | -           | -           |
| 79 | 1-(2,3,4-Trihydroxyphenyl)-ethanone                        | -           | 0.49        | -           | -           | -           | -           | -           |
| 80 | 5-Hydroxy-2,7-dimethyl-4-octanone                          | -           | -           | 0.31        | -           | -           | -           | -           |
| 81 | 1-(4-Hydroxy-3-methoxyphenyl)-2-propanone                  | -           | -           | 0.92        | 1.21        | 1.55        | -           | 0.79        |
| 82 | 3',5'-Dimethoxyacetophenone                                | 0.50        | 0.49        | 0.47        | -           | -           | -           | -           |
| 83 | 1-(2,6-Dihydroxy-4-methoxyphenyl)-ethanone                 | -           | -           | 0.93        | -           | -           | -           | -           |
| 84 | 2-(1,1-Dimethylethyl)-5-(1-methylethyl)-1,3-dioxolan-4-one | -           | -           | -           | 0.61        | -           | -           | -           |
| 85 | 1-(4-Hydroxy-3,5-dimethoxyphenyl)-ethanone                 | 1.29        | 0.94        | 0.69        | 1.11        | -           | -           | -           |
| 86 | 5-Ethyl-5-(2-propenyl)-2,4,6(1H,3H,5H)-pyrimidinetrione    | -           | -           | -           | -           | 1.46        | -           | -           |
| 87 | 3-(2-Hydroxy-ethyl)-1-methyl-3,7-dihydro-purine-2,6-dione  | -           | -           | -           | -           | 0.51        | -           | -           |
| 88 | 1-(4-Isopropoxy-3-methoxyphenyl)-propan-2-one              | 1.37        | 1.19        | -           | -           | -           | 0.63        | -           |
| 89 | 2,3,9-Trimethoxy-dibenz[d,f]cycloheptanone                 | -           | -           | -           | -           | -           | 0.44        | -           |
|    | <b>Aldehydes</b>                                           | <b>9.37</b> | <b>5.01</b> | <b>1.47</b> | <b>2.63</b> | <b>0.61</b> | <b>0.00</b> | <b>0.00</b> |
| 90 | Furfural                                                   | 5.34        | 3.61        | -           | -           | -           | -           | -           |

|     |                                                   |             |             |             |             |             |             |             |
|-----|---------------------------------------------------|-------------|-------------|-------------|-------------|-------------|-------------|-------------|
| 91  | 2-Ethyl-butanal                                   | -           | -           | -           | 1.60        | -           | -           | -           |
| 92  | 5-Methyl-2-furancarboxaldehyde,                   | 2.40        | -           | -           | -           | -           | -           | -           |
| 96  | Heptanal                                          | -           | -           | -           | 0.60        | -           | -           | -           |
| 94  | 2-Oxo-3-cyclopentene-1-acetaldehyde               | -           | -           | 1.47        | -           | -           | -           | -           |
| 93  | 5-(Hydroxymethyl)-2-furancarboxaldehyde           | 1.04        | 0.92        | -           | -           | -           | -           | -           |
| 95  | 4-Hydroxy-3,5-dimethoxy-Benzaldehyde              | 0.59        | 0.48        | -           | 0.43        | -           | -           | -           |
| 97  | 3,4,5-Trimethoxy-benzaldehyde                     | -           | -           | -           | -           | 0.61        | -           | -           |
|     | <b><i>Alcohol</i></b>                             | <b>5.50</b> | <b>5.50</b> | <b>8.22</b> | <b>4.77</b> | <b>3.59</b> | <b>6.23</b> | <b>6.30</b> |
| 98  | 3-Furanmethanol                                   | 4.95        | 4.09        | -           | -           | -           | 2.69        | 3.36        |
| 99  | Tetrahydro-2-furanmethanol                        | 0.55        | 0.42        | 4.30        | 1.89        | 3,18        | 2.27        | 2.94        |
| 100 | Glycolaldehyde dimethyl acetal                    | -           | 0.43        | -           | -           | -           | -           | -           |
| 101 | 2,3-Dihydro-1H-indene-1,2-diol                    | -           | -           | 0.38        | -           | -           | -           | -           |
| 102 | 1,2-Cyclohexanediol                               | -           | -           | 3.21        | -           | -           | -           | -           |
| 103 | 2,4-Dimethyl-4-octanol                            | -           | -           | 0.33        | -           | -           | -           | -           |
| 104 | 1-(Nitromethyl)-cyclohexanol                      | -           | -           | -           | 0.40        | -           | -           | -           |
| 105 | Alpha-methyl-alpha-benzenemethanol                | -           | -           | -           | -           | 0.41        | -           | -           |
| 106 | 4-(Butylnitrosoamino)-1-butanol                   | -           | 0.66        | -           | -           | -           | -           | -           |
| 107 | 2,3-Dihydro-2,2-dimethyl-3,7-benzofurandiol       | -           | -           | -           | 0.31        | -           | -           | -           |
| 108 | 4-Oxo-.beta.-isodamascol                          | -           | -           | -           | 1.25        | -           | -           | -           |
| 109 | Exo-norbornanol,methyl(pentamethylene)silyl ether | -           | -           | -           | 0.51        | -           | -           | -           |

|     |                                                                                                   |             |             |             |             |             |             |             |
|-----|---------------------------------------------------------------------------------------------------|-------------|-------------|-------------|-------------|-------------|-------------|-------------|
| 110 | 1,4:3,6-Dianhydro-,diacetateD-glucitol                                                            | -           | -           | -           | -           | -           | 1.27        | -           |
| 111 | 2,3-Dihydro-2-(4-hydroxy-3-methoxyphenyl)-5-(3-hydroxy-1-propenyl)-7-methoxy-3-benzofuranmethanol | -           | 0.32        | -           | -0.41       | -           | -           | -           |
|     | <b><i>Esters</i></b>                                                                              | <b>6.10</b> | <b>4.75</b> | <b>4.54</b> | <b>4.57</b> | <b>4.97</b> | <b>2.66</b> | <b>1.71</b> |
| 112 | Butyrolactone                                                                                     | -           | -           | -           | 0.74        | 0.98        | -           | -           |
| 113 | Propanoic acid, ethenyl ester                                                                     | 0.88        | 0.79        | 0.58        | -           | -           | -           | 0.31        |
| 114 | Methyl 2-furoate                                                                                  | 0.33        | -           | -           | -           | -           | -           | -           |
| 115 | Butanoic acid, 2-propenyl ester                                                                   | 0.86        | -           | -           | 0.41        | -           | -           | -           |
| 116 | 4-Oxo-pentanoic acid,methyl ester                                                                 | 0.38        | 0.45        | 0.41        | -           | -           | -           | -           |
| 117 | Cyclopentanecarboxylic acid, ethenyl ester                                                        | -           | -           | -           | 0.34        | -           | -           | -           |
| 118 | 3-Ethyl-2-pentenoic acid,methyl ester                                                             | 0.41        | -           | -           | 0.43        | -           | 0.48        | -           |
| 119 | (E)-2-Heptenoic acid, methyl ester                                                                | -           | -           | 0.71        | -           | -           | -           | -           |
| 120 | 2-Propenoic acid, 2-methyl-, oxiranylmethyl ester                                                 | -           | -           | -           | -           | 0.40        | -           | -           |
| 121 | Methyl 3-isothiocyanatopropionate                                                                 | 0.48        | -           | -           | -           | -           | -           | -           |
| 122 | 1,2-Ethandiol, diacetate                                                                          | 1.42        | 1.07        | -           | -           | -           | 1.50        | -           |
| 123 | 2-Methylene-octanoic acid, methyl ester                                                           | -           | 0.63        | -           | -           | -           | -           | -           |
| 124 | Acetic acid, 4-Isopropylidencyclohexyl ester                                                      | -           | -           | -           | -           | -           | -           | 0.51        |
| 125 | Heptanoic acid, 3,6,6-trimethyl-, methyl ester                                                    | -           | -           | -           | -           | -           | -           | 0.89        |
| 126 | 4-Hexenoic acid, 2-Acetyl-2,3-dimethyl-, ethyl ester, (E)- (stereoisomer 2)                       | -           | -           | -           | 0.69        | -           | -           | -           |
| 127 | Diethyl Phthalate                                                                                 | -           | -           | -           | 0.50        | 3.59        | -           | -           |

|     |                                                         |      |      |      |      |   |      |   |
|-----|---------------------------------------------------------|------|------|------|------|---|------|---|
| 128 | Methyl(3,4-dimethoxyphenyl)(hydroxy)acetate             | 1.34 | 0.90 | 1.34 | 1.23 | - | -    | - |
| 129 | (Z,Z)3,4-Diethyl-2,4-hexadienedioic acid,dimethyl ester | -    | -    | -    | -    | - | 0.32 | - |
| 130 | Butyric acid, 3-tetradecyl ester                        | -    | -    | 1.50 | -    | - | -    | - |
| 131 | Sulfurous acid, decyl 2-methyl-4-methoxybutyl ester     | -    | 0.34 | -    | -    | - | -    | - |
| 132 | 2,4-Dimethyl-Heneicosanoic acid, methyl ester           | -    | -    | -    | -    | - | 0.36 | - |
| 133 | l-Valine, Nallyloxycarbonyl, hexadecyl ester            | -    | 0.57 | -    | -    | - | -    | - |

27



28 **List of figures**

29

*Enterobacter aerogenes*

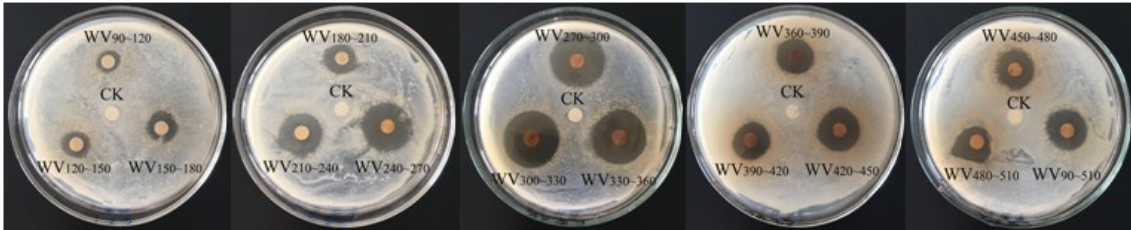

30

*Bacillus subtilis*

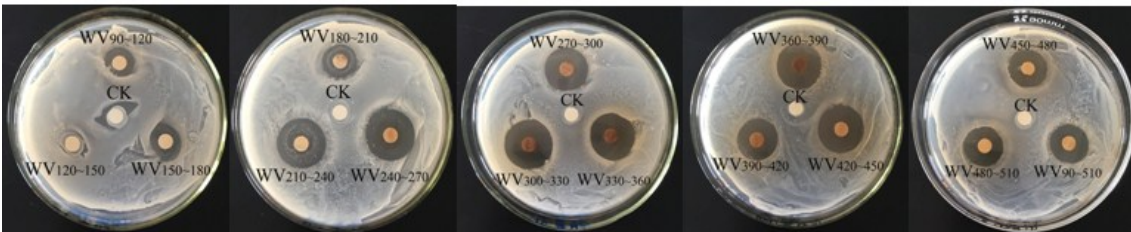

31

*Staphylococcus aureus*

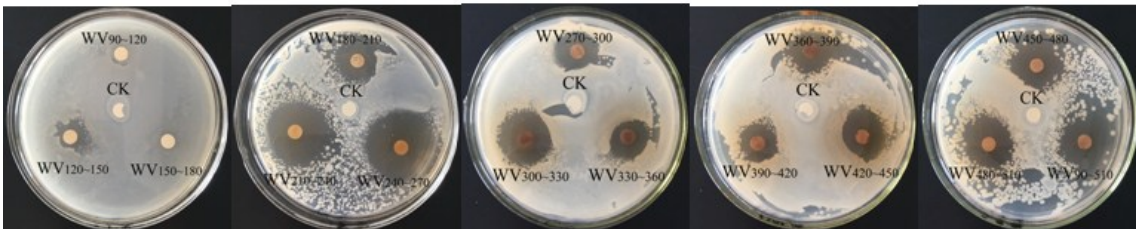

32

*Bacillus subtilis*

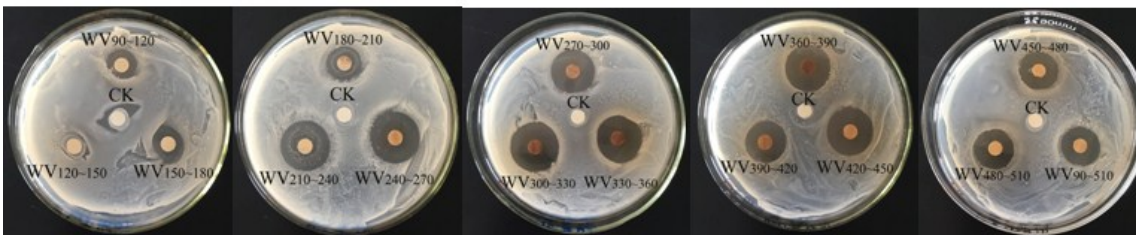

33

34 **Fig.S1. Antibacterial activities of wood vinegars of *Eucommia Ulmoides* Olivers**

35

**branches collected at different temperature ranges.**

36

*Penicillium*

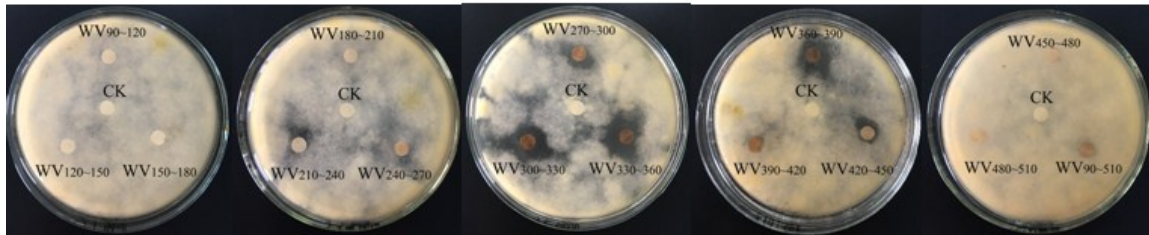

*Rhizopus*

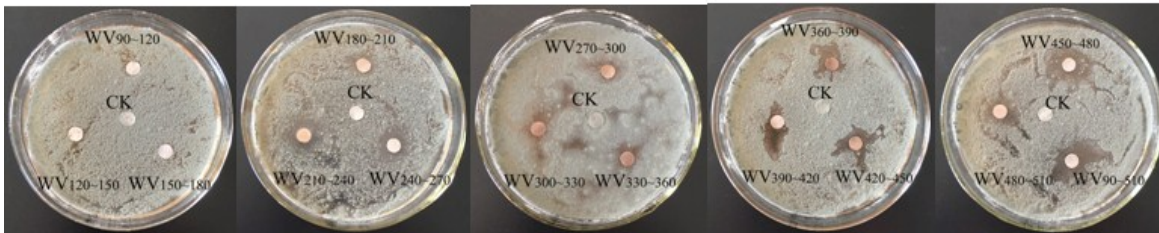

*Aspergillus*

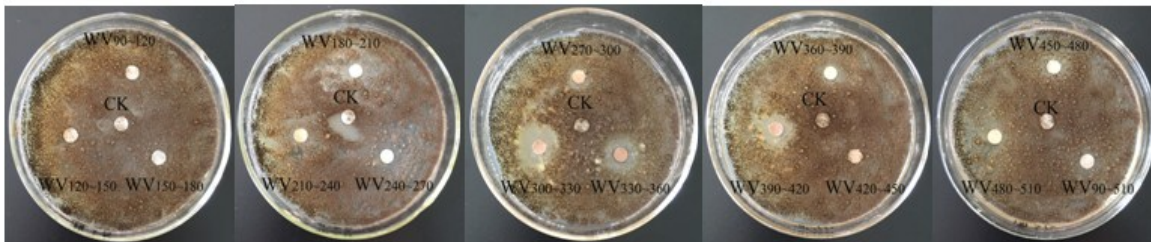

37

38 **Fig.S2. Anti-fungus activities of wood vinegars of *Eucommia Ulmoides* Olivers**  
39 **branches collected at different temperature ranges.**

40

41

42

43

44

*Buckwheat leaf spot*

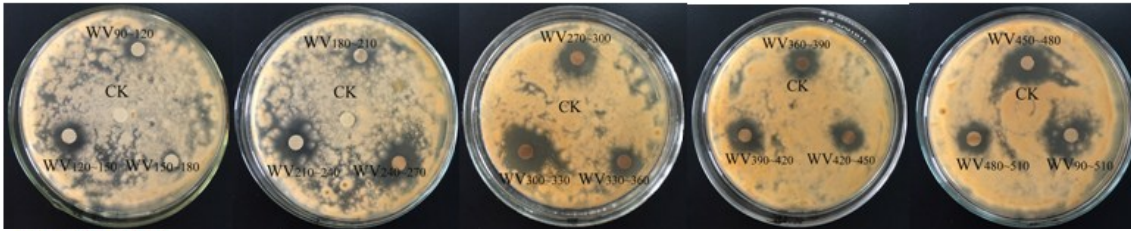

45

*Wheat root rot*

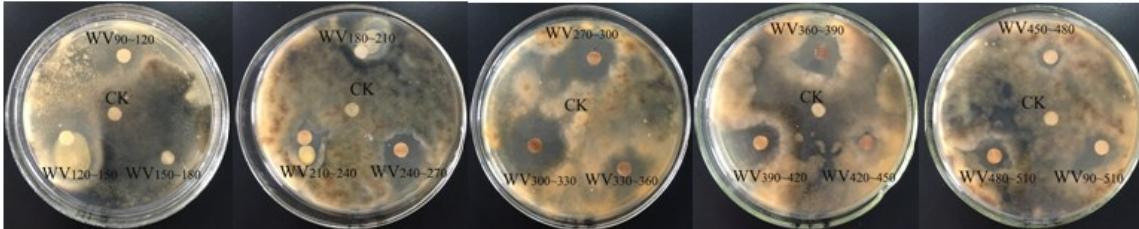

46

*Eggplant wilt*

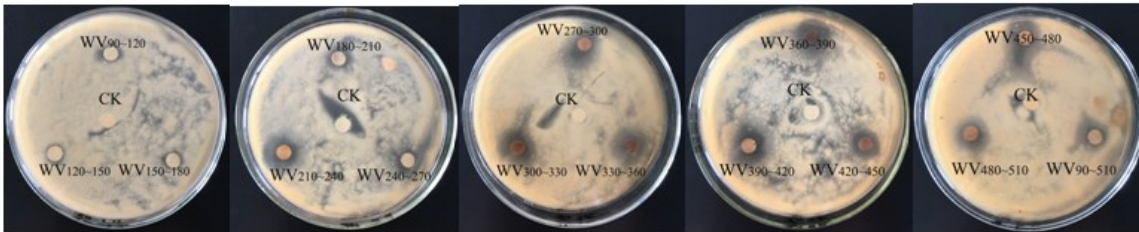

47

*Watermelon wilt*

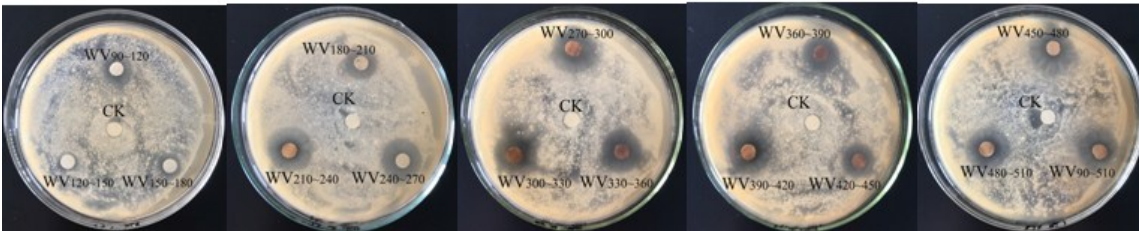

48

*Root rot*

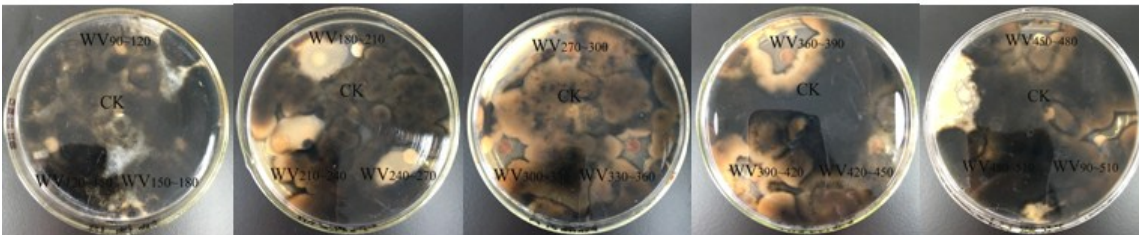

49

50 **Fig.S3. Anti-plant pathogens activities of wood vinegars of *Eucommia Ulmoides***

51 ***Olivers* branches collected at different temperature ranges.**
